# Supplementary material for: Nitro and Other Electron Withdrawing Group Activated Ruthenium Catalysts for Olefin Metathesis Reactions
Source: PubMed Central journal article supplement (PMC8246989; doi:10.1002/anie.202008150), 2020-12-03
Supplement: ANIE-60-13738-s001.pdf [file ANIE-60-13738-s001.pdf]

**Author Contributions**

A.K. Writing - Original Draft: Supporting; Writing - Review & Editing: Equal.
